# Supplementary material
Source: PubMed Central journal article supplement (PMC5467120)
Supplement: Supp_Figure1.pdf [file Supp_Figure1.pdf]

## Supplementary Data

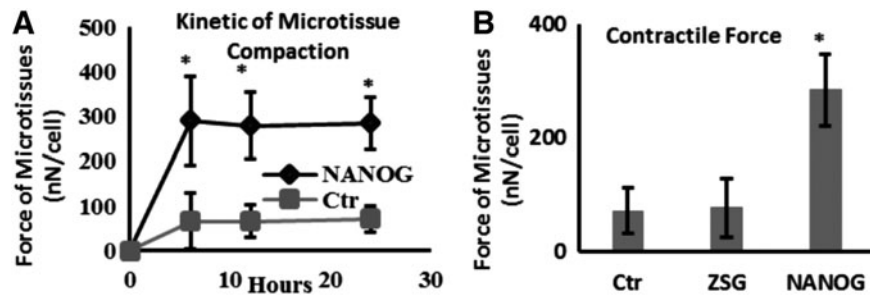

**SUPPLEMENTARY FIG. S1.** (A) Kinetics of force generation by control and NANOG microtissues. (B) Doxycycline has no effect on microtissue contraction. Data are presented as mean  $\pm$  standard deviation,  $n = 20$  for force measurements. \* denotes  $p < 0.05$  compared with control.
